1 IPSC-derived midbrain astrocytes from Parkinson's disease  
2 patients carrying pathogenic *SNCA* mutations exhibit alpha-  
3 synuclein aggregation, mitochondrial fragmentation and excess  
4 calcium release

5 Peter A. Barbuti<sup>1,2</sup> Paul Antony<sup>1</sup>, Gabriella Novak<sup>3</sup>, Simone B. Larsen<sup>1</sup>, Clara Berenguer-Escuder<sup>1</sup>, Bruno FR.  
6 Santos<sup>1,2</sup>, Francois Massart<sup>1</sup>, Dajana Grossmann<sup>1</sup>, Takahiro Shiga<sup>4</sup>, Kei-ichi Ishikawa<sup>4,5</sup>, Wado Akamatsu<sup>4</sup>,  
7 Steven Finkbeiner<sup>3,6</sup>, Nobutaka Hattori<sup>5</sup>, Rejko Krüger<sup>1,2,7</sup>

8 <sup>1</sup> Clinical and Experiment Neuroscience, Luxembourg Centre for Systems Biomedicine, University of Luxembourg, L-  
9 4362 Luxembourg

10 <sup>2</sup> Transversal Translational Medicine, Luxembourg Institute of Health, L-1445, Luxembourg

11 <sup>3</sup> Gladstone Institutes, the Taube/Koret Center for Neurodegenerative Disease, San Francisco, USA

12 <sup>4</sup> Center for Genomics and Regenerative Medicine, Juntendo University School of Medicine, Japan

13 <sup>5</sup> Department of Neurology, Juntendo University School of Medicine, Japan

14 <sup>6</sup> University of California, San Francisco, USA

15 <sup>7</sup> Parkinson Research Clinic, Centre Hospitalier de Luxembourg (CHL), Luxembourg

16 **i. Acknowledgments;**

17 The authors would like to thank the Parkinson's disease patients and healthy control individuals that  
18 supported our research. Moreover, we thank Grazia Iannello and Susanna Usmmaa for their work on  
19 previous iterations of the astrocyte protocol. We thank Kathryn Claiborn for reviewing the manuscript.  
20 We would like to acknowledge that Servier Medical Art ([www.servier.com](http://www.servier.com)) created the figures in the  
21 graphical abstract, licensed under a Creative Commons Attribution 3.0 Unported License. The research  
22 was funded by grants from the Fonds National de la Recherche within the PEARL programme  
23 (FNR/P13/6682797), the National Centre for Excellence in Research on Parkinson's disease (NCER-PD)  
24 programme, by the European Union's Horizon 2020 research and innovation programme under Grant  
25 Agreement No 692320 (WIDESPREAD; CENTRE-PD) and by the National Institutes of Health (RF1  
26 AG058475).

27      **ii.      Word Count: 7431**

28      **iii.      Abstract and keywords;**

29      Parkinson's disease (PD) is characterized by the loss of A9 midbrain dopaminergic neurons and the  
30      accumulation of alpha-synuclein aggregates in remaining neurons. Many studies of the molecular and  
31      cellular basis of neurodegeneration in PD have made use of iPSC-derived neurons from patients with  
32      familial PD mutations. However, approximately half of the cells in the brain are glia, and their role  
33      facilitating neurodegeneration is unclear. We developed a novel serum-free protocol to generate  
34      midbrain astrocytes from patient-derived iPSCs harbouring the pathogenic p.A30P, p.A53T mutations in  
35      *SNCA*, as well as duplication and triplication of the *SNCA* locus. In our cellular model, aggregates of alpha-  
36      synuclein occurred only within the GFAP<sup>+</sup> astrocytes carrying the pathogenic *SNCA* mutations. Assessment  
37      of spontaneous cytosolic calcium (Ca<sup>2+</sup>) release using Fluo4 revealed that *SNCA* mutant astrocytes  
38      released excess Ca<sup>2+</sup> compared to controls. Unbiased evaluation of 3D mitochondrial morphometric  
39      parameters showed that these *SNCA* mutant astrocytes had increased mitochondrial fragmentation and  
40      decreased mitochondrial connectivity compared to controls, and reduced mitochondrial bioenergetic  
41      function. This comprehensive assessment of different pathogenic *SNCA* mutations derived from PD  
42      patients using the same cellular model enabled assessment of the mutation effect, showing that p.A53T  
43      and triplication astrocytes were the most severely affected. Together, our results indicate that astrocytes  
44      harbouring the familial PD mutations in *SNCA* are dysfunctional, suggesting a contributory role for  
45      dysfunctional astrocytes in the disease mechanism and pathogenesis of PD.

46      **Keywords:** midbrain astrocytes, patient-derived, Parkinson's disease, *SNCA*, alpha-synuclein,  
47      mitochondria, calcium

48      **iv.      Table of Contents Image;**

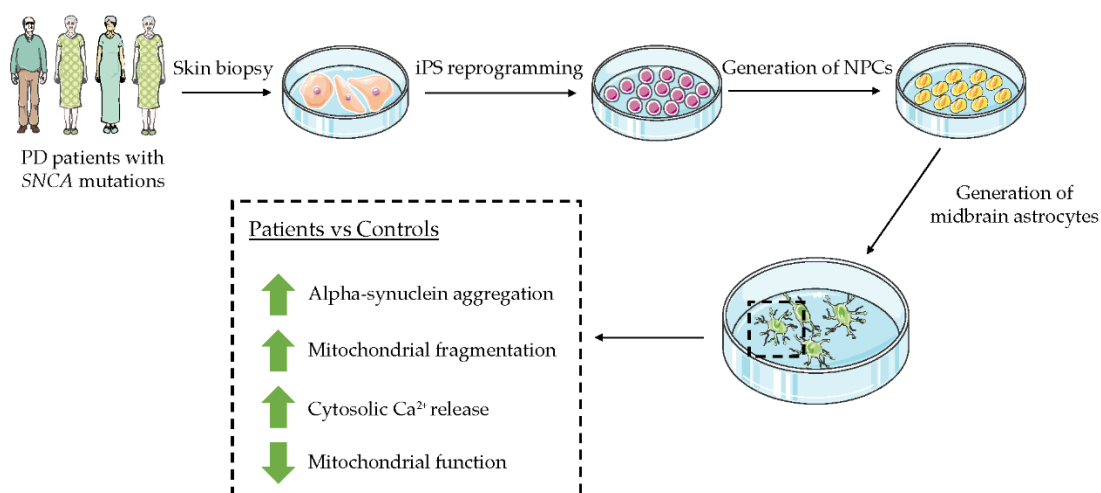

49

50

51

## 52 v. Main Points;

- 53 • We used a novel serum-free protocol to generate midbrain-specific functional
- 54 astrocytes from Parkinson's disease patients carrying pathological mutations in *SNCA*
- 55 • Patient-derived astrocytes show morphological and functional impairments

## 56 vi. Main Text;

### 57 Introduction

58 Parkinson's disease (PD) is a neurodegenerative disease with two neuropathological hallmarks: the  
59 degeneration of neurons from the substantia nigra pars compacta (SNc) in the midbrain projecting to the  
60 striatum, and the accumulation of intracellular protein inclusions (Lewy bodies, LBs) in the neurons that  
61 remain. LBs are immunopositive for the alpha-synuclein protein, and contain crowded organelles and a  
62 high concentration of lipids (Shahmoradian et al., 2019; Spillantini, Crowther, Jakes, Hasegawa, &  
63 Goedert, 1998). Five pathogenic point mutations in *SNCA*, which encodes alpha-synuclein, are known to  
64 cause autosomal dominant PD: p.A53T (Polymeropoulos et al., 1997), p.A30P (Krüger et al., 1998), p.E46K  
65 (Zarranz et al., 2004), p.G51D (Lesage et al., 2013), and p.A53E (Pasanen et al., 2014). Duplications or  
66 triplications of the *SNCA* locus also cause familial PD, indicating that increased levels of wildtype alpha-  
67 synuclein may be sufficient to cause disease (Chartier-Harlin et al., 2004; Singleton et al., 2003). Indeed,  
68 genome wide association studies (GWAS) show that single nucleotide polymorphism (SNP) genetic

69 variants in *SNCA* are a risk factor in sporadic PD related to modulation of alpha-synuclein expression  
70 (Chiba-Falek, Lopez, & Nussbaum, 2006; Edwards et al., 2010; Pihlstrøm et al., 2018).

71 In addition to neuronal alpha-synuclein aggregates, numerous cases of alpha-synuclein positive astrocytes  
72 have also been identified in the post-mortem brain of idiopathic PD patients (Braak, Sastre, & Del Tredici,  
73 2007; Song et al., 2009; Wakabayashi, Hayashi, Yoshimoto, Kudo, & Takahashi, 2000). Furthermore, glial  
74 and oligodendrocyte alpha-synuclein inclusions have been found in the post-mortem brain of patients  
75 with the p.A30P, p.A53T and p.G51D *SNCA* mutations (Kiely et al., 2013; Markopoulou et al., 2008; Seidel  
76 et al., 2010). One reason this pathology was only rarely described in earlier reports may be that astrocyte  
77 alpha-synuclein inclusions are poorly labelled or unlabeled when using N- and C- terminal antibodies, and  
78 can be visualized only using harsh antigen retrieval methods (Sorrentino, Giasson, & Chakrabarty, 2019).  
79 Taken together, these data indicate that glial pathology occurs in sporadic and familial PD, although alpha-  
80 synuclein glial aggregates/inclusions are likely to be underreported.

81 The motor symptoms of PD typically occur when approximately 70% of nigral neurons are degenerated  
82 (Fearnley & Lees, 1991). However, in the adult brain neurons exist in a dynamic microenvironment with  
83 glial cells at an approximate ratio of 1:1 (von Bartheld, Bahney, & Herculano-Houzel, 2016), with  
84 astrocytes being the most abundant cell type (Azevedo et al., 2009). Glia, and specifically astrocytes,  
85 regulate and support neurons at the tripartite synapse, are involved in synaptogenesis, synaptic pruning,  
86 neuronal branching, and the release and regulation of metabolites, neuro- and gliotransmitters and  
87 neurotrophic factors (Eroglu & Barres, 2010; Harada, Kamiya, & Tsuboi, 2016). This glial support is  
88 underpinned by transient elevations in astrocyte calcium ( $Ca^{2+}$ ) signalling, although this is still not fully  
89 understood (Bazargani & Attwell, 2016). Dysregulated calcium homeostasis has long been implicated in  
90 PD (Schapira, 2013), with increasing  $Ca^{2+}$  levels leading to clustering of alpha-synuclein at the synaptic  
91 vesicle (Lautenschläger et al., 2018).

92 The interplay between astrocytes and neurons in PD pathogenesis has become a focus of intensive  
93 research. Astrocytes exist in neurotoxic (A1) or neuroprotective (A2) subsets, and A1 astrocytes are found  
94 in abundance in the SNc of idiopathic PD patients (Liddel et al., 2017). Astrocytes act as effective  
95 scavengers of alpha-synuclein, and the transmission of alpha-synuclein from neurons-to-astrocytes,  
96 astrocytes-to-astrocytes and astrocytes-to-neurons have all been reported (Cavaliere et al., 2017; H.-J.  
97 Lee et al., 2010; Rostami et al., 2017). In summary, there is emerging evidence pertaining astrocyte  
98 dysfunction in the pathogenesis of PD.

99 In this present study, we generated iPSC-derived midbrain astrocytes from patients carrying pathogenic  
100 mutations in *SNCA* and from healthy controls. Many human astrocyte culture protocols use commercial  
101 animal serum, which not only has seasonal and geographical batch-to-batch variation, but also contains a  
102 non-defined mixture of components that renders the astrocytes reactive (Gstraunthaler, Lindl, & Valk,  
103 2013; Magistri et al., 2016; Perriot et al., 2018). We generated astrocytes using a novel serum-free  
104 protocol that supported astrocyte growth and maturity for a minimum of 140 days, expressing the  
105 midbrain marker FoxA2 in addition to astrocytic markers including ALDH1L1, Vimentin, AQP4, S100 $\beta$  and  
106 GFAP. In astrocytes derived from patients with *SNCA* mutations, we observed aggregation of alpha-  
107 synuclein and significant elevation in Ca<sup>2+</sup> release. An in-depth assessment of mitochondrial morphology  
108 determined that mutant astrocytes have increased mitochondrial fragmentation contributing to  
109 mitochondrial dysfunction. Overall, our results directly indicate that astrocytes harbouring pathogenic  
110 *SNCA* mutations are dysfunctional, and intervention strategies for the rescue of non-neuronal cells should  
111 be considered in the early stages of the disease.

## 112 **Methods**

### 113 *Ethics*

114 Ethical approval for the development of and research pertaining to patient-derived cell lines was granted  
115 given by the National Ethics Board of Luxembourg, (Comité National d’Ethique dans la Recherche; CNER  
116 #201411/05).

### 117 *Cell lines*

118 The induced pluripotent stem cell (iPSC) lines used in this study are shown in Table 1 with the culture  
119 conditions previously described (Simone B Larsen et al., 2020).

### 120 *Generation of neural precursor cells*

121 The neural precursor cells (NPCs) were generated and cultured according to an established small molecule  
122 NPC (smNPC) protocol (Reinhardt et al., 2013). The characterisation of the homogenous NPCs is shown in  
123 Supplementary Figure 2 with the culture conditions detailed in the Supplementary Experimental  
124 Procedures.

### 125 *Generation of midbrain astrocytes*

126 NPCs dissociated to single cells using Accutase (ThermoFisher) were plated  $4 \times 10^5$  in a well of a 6well plate  
127 pre-coated with Geltrex™ (ThermoFisher). The media used for the glial induction was a 50:50 mix of  
128 DMEM/F12 and Neurobasal, containing 1% B27, 0.5% N2, plus 1% Glutamax and Penicillin/Streptomycin  
129 (all Life Technologies). Cells were passaged in a ratio of 1:5 upon reaching confluence within the first 10  
130 days of astrocyte patterning and proliferation; thereafter astrocytes were passaged at a ratio of 1:2. All  
131 experiments described in this manuscript were performed from day 60 onwards after the beginning of  
132 astrocyte differentiation.

### 133 *Generation of midbrain dopaminergic neurons*

134 NPCs were differentiated to midbrain dopaminergic neurons according to the previously published  
135 protocol (Reinhardt et al., 2013).

### 136 *Real-time PCR*

137 The RNA was extracted and reverse transcribed to cDNA as previously published (Simone B Larsen et al.,  
138 2020). RT-PCR was used to detect transcripts of the following genes (5'-3'): GFAP, forward:  
139 ATCCCAGGAGCGAGCAGAG, reverse: CCCAGCCAGGGAGAAATCCA; Aquaporin-4 (AQP4), forward:  
140 TGAGTGACAGACCCACAGCA, reverse: TTGATGGTGGATCCCAGGCTG; S100 calcium-binding protein  $\beta$   
141 (S100 $\beta$ ), forward: TGGAAGGGAGGGAGACAAGC, reverse: CCTGGAAGTCACATTCGCCG; Alpha-2-  
142 Macroglobulin (A2M), forward: AGCTTTGTCCACCTTGAGCC, reverse: CAGTTCGGACAATGCCTCCC; Tyrosine  
143 hydroxylase (TH), forward: AGTGCACCCAGTATACCGC, reverse: TCTCAGGCTCCTCAGACAGG;  $\beta$ -actin,  
144 forward: GAAGTTGGGTTTTCCAGCTAA, reverse: GGAGAACAATTCTGGGTTTGA. KOD Hot Start DNA  
145 polymerase (0.02U/ $\mu$ L; Merck) was used with the following programme: Pre-denaturation (95°C; 2mins),  
146 35 cycles of denaturation (95°C; 30s), annealing (60°C; 45s) and extension (70°C; 60s), followed by a final  
147 extension (70°C; 5mins). The results were normalized to  $\beta$ -actin.

### 148 *Immunocytochemistry*

149 Astrocytes were fixed at d120 of directed differentiation from NPCs with the fixation, permeabilization  
150 and imaging performed as previously detailed (Simone B Larsen et al., 2020). The primary antibodies used  
151 were anti- alpha-synuclein (1:250; BD Transduction, #610787), -Connexin-43 (1:150; Santa Cruz, sc-  
152 271837), -FoxA2 (1:100; Santa Cruz, sc-101060), -Gl Syn (1:100; Santa Cruz, sc-74430), -GFAP (1:1000;  
153 Dako, Z0334), -NF68 (1:200; Sigma, N-5139), -S100 $\beta$  (1:100; Abcam, ab868) -TUBB3 (1:300; Covance,  
154 MRB-435P) -Vimentin (1:100; Santa Cruz, sc-373717). Secondary antibodies used were: Alexa Fluor 488

155 Goat anti-Mouse IgG (H+L) (1:1000; Invitrogen, A11029), Alexa Fluor 568 Goat anti-Rabbit IgG (H+L)  
156 (1:1000; Invitrogen, A11036). Hoechst 33342 (Invitrogen, H3570) was used as a nuclei counterstain.

#### 157 *Cell counts*

158 NPCs were directly differentiated to midbrain astrocytes for over 80 days, plated onto coverslips and fixed  
159 and stained for the neuronal marker TUBB3, the pan-astrocytic marker Vimentin, and the nuclear stain  
160 Hoechst 33342. Between 5-10 fields of view (FOV) were acquired per coverslip using the 10-25x objective  
161 lens with approximately 1500 total cells counted. The merged image was processed in ImageJ where the  
162 image was converted to RGB stack, with the three stains shown in separate (red/green/blue) channels.  
163 The “Cell Counter” plug-in was used to count the Hoechst-stained nuclei before the TUBB3 stained  
164 neurons were quantified on the overlaid image.

#### 165 *Protein Immunoblotting*

166 The protein immunoblotting cells pellets were extracted using RIPA buffer (Tris HCl pH 7.4, (50 mM); NaCl  
167 (150 mM); Triton-X-100 (1%); sodium deoxycholate (0.5%); SDS (0.1%); EDTA (1mM); Tris-HCl (50mM);  
168 NaCl (150mM)) plus 1 tablet of cComplete™ proteinase inhibitor cocktail (Roche) per 20mL of RIPA buffer.  
169 Polyacrylamide gels (10%) were blotted by dry transfer on 0.2μM nitrocellulose membranes using the  
170 iBlot™ 2 Gel Transfer Device (ThermoFisher). Primary anti-alpha-synuclein (1:1000; BD Transduction,  
171 #610787) and -β-actin (1:20,000; Cell Signaling, 3700S) antibodies were probed overnight followed by  
172 incubation for 1 hour with secondary antibodies conjugated to HRP (Invitrogen). Densitometry was  
173 performed using ImageJ (Schneider, Rasband, & Eliceiri, 2012) and normalized to β-actin.

#### 174 *Flow Cytometry*

175 Astrocytes were dissociated to single cells using Accutase and fixed dropwise whilst vortexing in 4% PFA  
176 before being placed onto an orbital roller for 15 minutes. Cells were incubated in Saponin buffer (0.05%  
177 Saponin, 1% BSA). The primary antibodies used were anti- ALDH1L1 (1:100; Santa Cruz, sc-100497), GFAP  
178 (1:300; Dako, Z0334), S100β (1:100; Abcam, ab868). The secondary antibodies used are detailed above.  
179 Secondary antibody only-stained cells were used as a gating control. Flow cytometry was run using the  
180 LSRFortessa™ (BD Biosciences) cell analyzer with FlowJo software version 10.0.7 (LLC) used for the  
181 visualizations of the graphs.

#### 182 *Detection of Calcium*

183  $5 \times 10^4$  astrocytes were seeded onto 8 well chamber slides coated with polyornithine and laminin and left  
184 for 48 hours. The Fluo-4 Calcium Imaging Kit (Invitrogen™, F10489) was used for the detection of cytosolic  
185  $\text{Ca}^{2+}$  according to the manufacturer's guidelines. For the live cell image acquisition, live-streaming mode  
186 was used for 20 minutes per cell line on a pre-heated stage set to 37°C within a heated chamber. The Zen  
187 2.3 software (blue edition) on a Zeiss Spinning Disk confocal microscope (Carl Zeiss Microimaging GmbH)  
188 was used for the acquisition. For the detection of spontaneously released cytosolic calcium, the video was  
189 exported as single image files and a minimum of 50 firing cells per cell line were selected using Fiji  
190 (Schindelin et al., 2012). The calcium signaling analyzer (CaSiAn) tool was used to analyze the  $\text{Ca}^{2+}$  spikes  
191 and is previously described (Moein et al., 2018).

#### 192 *Measurement of oxygen consumption rate*

193 Oxygen consumption rate (OCR) and extracellular acidification rate (ECAR) were measured from the  
194 plated astrocytes using the Seahorse XFe96 Cell Metabolism Analyzer (Agilent). Astrocytes were  
195 dissociated to single cells and plated at a density of  $1 \times 10^4$  per well, a minimum of 6 wells were used per  
196 line per experiment. Mitochondrial respiration was determined using a mitochondrial stress test 48 hours  
197 after plating according to the manufacturer's instructions using the Seahorse Wave software (2.6.0,  
198 Agilent). The final concentrations of Oligomycin (1 $\mu\text{M}$ ; #75351), FCCP (500nM; #C2920), Rotenone (5 $\mu\text{M}$ ;  
199 #R8875) and Antimycin A (5 $\mu\text{M}$ ; #A8674) (all Sigma) used in the stress test were normalized by total  
200 protein. This was performed directly after the conclusion of the stress test by lysing with RIPA buffer and  
201 calculating the total protein using a BCA assay.

#### 202 *Assessment mitochondrial morphology and pyknotic nuclei*

203 Mitochondrial morphology was assessed by Tom20, a subunit of the translocase of the mitochondrial  
204 outer membrane (TOM) complex. At day 60 of astrocyte differentiation,  $5 \times 10^4$  astrocytes were seeded  
205 onto 8 well chamber slides coated with polyornithine and laminin and left for 48 hours. The astrocytes  
206 were fixed in paraformaldehyde (4% in PFA) and permeabilized using Triton-X-100 as previously described  
207 (Simone B Larsen et al., 2020). The mouse anti-Tom20 antibody (1:1000; Santa Cruz, sc-17764) was used  
208 with the Alexa Fluor 488 (Life Technologies) antibody used to detect Tom20. Hoechst 33342 (Invitrogen;  
209 #H3570) was used as a nuclear stain and for normalization. A minimum of ten aleatory fields were  
210 acquired for each condition using the 63x objective as Z-stacks (at 0.26 $\mu\text{m}$  intervals) covering the entire  
211 depth of the cell. Images were acquired using the Zeiss Spinning Disk confocal microscope (Carl Zeiss  
212 Microimaging GmbH). Maximum intensity projection was used to visualize the 3D Z-stacks for the 2D



213 analysis of mitochondrial morphology. The morphometric analysis of the mitochondrial morphology as  
214 shown in Table 2 was previously established with morphometric features defined (Antony et al., 2020).  
215 Briefly, Form Factor =  $\text{Perimeter}^2/4\pi\text{Area}$ ; Aspect Ratio = Major axis length/minor axis length;  
216 Mitochondrial number = Mitochondrial pixels / nuclei pixels. MitoPerimeterProportion\_Norm =  
217 MitoPerimeterPixels / MitoPixels; MitoShapeByPerimeter\_Norm = MitoBodyPixels/MitoPerimeterPixels;  
218 MitoSkelProportion\_Norm = MitoSkel/MitoPixels; MitoErosionBodies\_Norm = MitoBodies/MitoCount;  
219 PyknosisMetric\_Norm = PyknoticPixels/NucleiPixels.

## 220 *Statistical analysis*

221 GraphPad Prism® (Version 8.3.0, GraphPad Software Inc., USA) was used for statistical analyses. The type  
222 of statistical analyses performed and P-value for each experiment can be found in the legend of each  
223 figure.

## 224 **Results**

### 225 **Generation of patient-derived midbrain astrocytes using a serum-free protocol**

226 We used a previously published protocol to generate rapidly expandable homogenous neural precursor  
227 cells (NPCs) from patient-derived iPSC lines (Table 1) (Reinhardt et al., 2013). The NPCs were  
228 cryopreservable and committed as a multipotent progenitor to the neural lineage without pluripotent or  
229 non-neural contamination, and were used as a starting point for astrocyte differentiation (Figure 1A).  
230 Astrocyte-specific cultures were successfully generated from three healthy control iPSC lines and four  
231 SNCA mutant iPSC lines: the point mutations p.A30P and p.A53T, and the duplication and triplication of  
232 the SNCA gene locus. For regionally-specific astrocyte specification and patterning, the midbrain-  
233 hindbrain boundary transcription factor fibroblast growth factor (FGF) 8b (100ng/mL; Peprotech, 100-25)  
234 was used to promote midbrain identity (S. M. Lee, Danielian, Fritzsich, & McMahon, 1997). Epidermal  
235 growth factor (EGF)(20ng/mL; Peprotech, AF-100-15) and FGF2 (10ng/mL; Peprotech, 100-18B) was used  
236 to specify gliogenesis (Liu & Neufeld, 2007), with Heparin (5µg/mL; Sigma, H3149) added to potentiate  
237 the effect of FGF2 (Caldwell, Garcion, terBorg, He, & Svendsen, 2004). Leukaemia inhibitory factor  
238 (LIF)(5ng/mL; Peprotech, AF-300) was added to activate the JAK-STAT pathway committing the cells to  
239 gliogenesis (Bonni et al., 1997), and the histone deacetylase (HDAC) inhibitor Valproic acid (VPA)(1mM;  
240 Sigma, P4543) was used to increase the expression of GDNF (Rincón Castro, Gallant, & Niles, 2005) and  
241 glial precursor proliferation (H. J. Lee, Dreyfus, & DiCicco-Bloom, 2016). The mitogens FGF2, FGF8b and  
242 EGF along with Heparin, LIF and VPA were removed from the culture to induce the immature proliferative

243 astrocytes to differentiate into terminally differentiated astrocytes. Heregulin 1 $\beta$  (5ng/mL; Peprotech,  
244 100-03) and CNTF (5ng/mL; Peprotech, 450-13) was used to induce the differentiation of the precursors,  
245 with Heregulin 1 $\beta$  removed at day 30 of directed astrocyte differentiation (Pinkas-Kramarski et al., 1994).  
246 The committed astrocytes were left to mature in terminal differentiation media with CNTF maintaining  
247 the upregulated JAK-STAT pathway (Bonni et al., 1997). After 30 days of directed astrocyte differentiation  
248 the immature astrocytes from the Ctrl 17 line were >80% GFAP positive, 30-70% S100 $\beta$  positive, and <5%  
249 positive for ALDH1L1. Continued maturation for 90 days increased the proportion of both GFAP and S100 $\beta$   
250 positive cells to >98%, and the percentage of ALDH1L1 positive cells increased with time to 50-70% (Figure  
251 1B).

252 At d120, we compared astrocyte gene expression to d45 iPS-derived midbrain dopaminergic neurons  
253 generated using a previously published protocol (Reinhardt et al., 2013)(Figure 1C). The expression of the  
254 astrocyte-specific genes *S100 $\beta$* , *GFAP*, *AQP4*, *A2M* were all significantly higher in astrocytes than neurons,  
255 and the rate-limiting enzyme in catecholamine biosynthesis that converts tyrosine to L-Dopa and  
256 specifically found in dopaminergic neurons was enriched in neurons compared to the astrocytes (Figure  
257 1C). Immunocytochemistry revealed robust expression of GFAP, S100 $\beta$ , Vimentin, Connexin 43, Glutamine  
258 Synthetase (Gl Syn), the regionally specific midbrain marker FoxA2 (Figure 1D) and the absence of  
259 neurofilament 68 protein (NF68). Astrocyte purity was quantified by determining the number of cells  
260 expressing the pan-astrocytic marker Vimentin and the number expressing the neuronal marker  $\beta$ -3-  
261 Tubulin (TUBB3). Each astrocyte line was >90% pure, and there was no significant difference in purity  
262 between controls and astrocytes harbouring *SNCA* mutations (Supplementary Figure 1).

### 263 **Aggregation of alpha-synuclein in astrocytes harbouring *SNCA* mutations.**

264 Alpha-synuclein protein was detectable in all astrocyte lines, and highest in the *SNCA* triplication cell line,  
265 although approximately 10-fold lower than the level detectable in iPS-derived neurons (Figure 2A). A low  
266 but detectable population of contaminating neurons were found in these cultures (Supplementary Figure  
267 1). Immunocytochemistry confirmed the presence of alpha-synuclein in GFAP<sup>+</sup> astrocytes (Figure 2B). In  
268 healthy control lines, alpha-synuclein was found well distributed and typically localised to the cytoplasm,  
269 whereas alpha-synuclein aggregates were detectable in astrocytes harbouring the pathogenic *SNCA*  
270 mutations (Figure 2B).

### 271 **Excess cytosolic Ca<sup>2+</sup> release in *SNCA* mutant astrocytes**

272 To validate that the astrocytes were functionally mature, we assessed the physiological propagation of  
273 intercellular  $\text{Ca}^{2+}$  waves using the Fluo-4 AM indicator of cytosolic  $\text{Ca}^{2+}$  under basal conditions. We were  
274 able to detect calcium waves in all cell lines and used the Calcium Signal Analyzer (CaSiAn) software tool  
275 (Moein et al., 2018) to quantify the  $\text{Ca}^{2+}$  dynamics (Figure 3A-3B). Astrocytes harboring p.A30P and p.A53T  
276 point mutations or the *SNCA* triplication had increased amplitude of  $\text{Ca}^{2+}$  spikes (Figure 3C), indicating  
277 increased levels of cytosolic  $\text{Ca}^{2+}$  compared to the control lines. Additionally, the p.A30P and p.A53T lines  
278 released  $\text{Ca}^{2+}$  into the cytoplasm at greater rates than the controls (Figure 3D), and astrocytes with the  
279 *SNCA* triplication line had a greater spike triangle (Figure 3E), indicating increased  $\text{Ca}^{2+}$  release per  $\text{Ca}^{2+}$   
280 spike.

### 281 **Astrocytes containing pathogenic mutations in *SNCA* have fragmented mitochondria and increased cell** 282 **death**

283 In many cellular models of PD, excess or pathogenic alpha-synuclein has been shown to lead to  
284 mitochondrial fragmentation in neurons (Guardia-Laguarta et al., 2014; Kamp et al., 2010; Nakamura et  
285 al., 2011; Zambon et al., 2019). Additionally, increased abundance of alpha-synuclein leads to increased  
286 transfer of  $\text{Ca}^{2+}$  from the ER to the mitochondria (Cali, Ottolini, Negro, & Brini, 2012), and  $\text{Ca}^{2+}$  overload  
287 has been associated with mitochondrial fragmentation and cell death (Granatiero, Pacifici, Raffaello, De  
288 Stefani, & Rizzuto, 2019). Therefore, we assessed mitochondrial form factor and aspect ratio in the  
289 patient-derived astrocytes. At d90 of differentiation, lines harbouring *SNCA* mutations showed increased  
290 mitochondrial fragmentation compared to control astrocytes (Figure 4A-C), similar to findings in PD  
291 neurons (S B Larsen, Hanss, & Krüger, 2018). Additional in-depth mitochondrial morphometric analysis of  
292 3D mitochondrial networks (Antony et al., 2020) revealed an increased number of swollen, spherical  
293 mitochondria with reduced branching and connectivity in the *SNCA* mutant astrocytes compared to  
294 controls (Table 2). Notably, the lines harbouring the two *SNCA* mutations that cause earlier disease onset  
295 and increased clinical severity—p.A53T and *SNCA* triplication—showed more severe mitochondrial  
296 morphological impairment than *SNCA* duplication line, indicating an alpha-synuclein dosage effect. The  
297 p.A30P mutation line had deficits in mitochondrial branching (form factor), whereas mitochondrial length  
298 (aspect ratio) and number was unaffected. Lastly, we determined the presence of pyknotic nuclei, an early  
299 indicator of cell death. The p.A53T and *SNCA* triplication lines had an increased number of pyknotic nuclei,  
300 there was a mild elevation in the number of pyknotic nuclei in the *SNCA* duplication line, and no difference  
301 between the p.A30P and controls (Table 2).

### 302 **Aberrant mitochondrial function in heterozygous mutant *SNCA* astrocytes**

303 We evaluated the bioenergetic profile of the patient-derived astrocytes by assessing mitochondrial  
304 function using oxygen consumption rate (OCR) and extracellular acidification rate (ECAR) during a  
305 mitochondrial stress test. Astrocytes harbouring p.A30P and p.A53T heterozygous mutations had  
306 significantly reduced OCR compared to the controls (Figure 5A) and the p.A53T and triplication mutants  
307 had significantly reduced ECAR compared to controls (Figure 5B). Furthermore, both the p.A53T line and  
308 the pA30P line exhibited deficits in maximum respiration and non-mitochondrial oxygen consumption,  
309 and astrocytes harboring the p.A53T alpha-synuclein mutation had deficient spare respiratory capacity  
310 (Figures 5C-H).

### 311 **Discussion**

312 Astrocytes are heterogeneous and display inter- and intra-regional distinctions (Morel et al., 2017).  
313 Previous studies have generated region-specific astrocytes from human iPS cells representing the spinal  
314 cord (Roybon et al., 2013) and the forebrain (Bradley et al., 2019). We developed a serum-free protocol  
315 that for the first time shows the generation of midbrain astrocytes from patient-derived iPSCs, which have  
316 particular relevance for the study of PD. This protocol notably results in enrichment in the astrocyte  
317 maturation marker ALDH1L1 over time, and expression of the midbrain specific marker FoxA2, the pan-  
318 astrocytic marker Vimentin, mature astrocyte markers Connexin 43, Gl Syn and *AQP4*, and the commonly  
319 used astrocyte markers S100 $\beta$  and GFAP.

320 The level of *SNCA* expression in astrocytes compared to neurons and oligodendrocytes is low (Booth, Hirst,  
321 & Wade-Martins, 2017; Zhang et al., 2016). Although there is considerable evidence of alpha-synuclein  
322 accumulation in astrocytes (Braidy et al., 2013; Cavaliere et al., 2017; di Domenico et al., 2019; Rostami  
323 et al., 2017), it is generally accepted that astrocytes themselves do not express detectable levels of the  
324 soluble monomeric alpha-synuclein protein. We speculate that in our system, the presence of a small but  
325 detectable population of neurons generates alpha-synuclein that is subsequently taken up by the  
326 astrocytes.

327 During aging and disease, astrocytes display Ca<sup>2+</sup> dysregulation, characterized by extensive cytosolic Ca<sup>2+</sup>  
328 levels, increased Ca<sup>2+</sup> transients and more frequent Ca<sup>2+</sup> oscillations (Kuchibhotla, Lattarulo, Hyman, &  
329 Bacskai, 2009). In our model of patient-derived iPS-derived midbrain astrocytes, we show dysregulation  
330 of cytosolic Ca<sup>2+</sup> in the astrocytes carrying pathogenic *SNCA* mutations. However, the mode of astrocyte  
331 dysregulation in the form of Ca<sup>2+</sup> overload differs between the *SNCA* triplication line and the heterozygous  
332 mutants. The astrocytes carrying the triplication of the *SNCA* gene released more cytosolic Ca<sup>2+</sup> over a

333 longer duration whereas both the A30P and A53T point mutations release excess  $\text{Ca}^{2+}$  due to increased  
334 rate of  $\text{Ca}^{2+}$  influx into the cytosol. Interestingly, the *SNCA* duplication line displayed no measurable  
335 differences in cytosolic  $\text{Ca}^{2+}$  compared to the controls, suggesting a critical threshold of physiological  
336 alpha-synuclein is required for  $\text{Ca}^{2+}$  cytosolic overload.

337 To date, this study is the most comprehensive assessment of PD patients harbouring different pathogenic  
338 *SNCA* mutations expressing physiological levels of the endogenous alpha-synuclein protein. Moreover,  
339 our analysis allows cross-correlations between the pathogenic mutations that have not been described  
340 before. Our data show that mitochondrial fragmentation is not only a key indicator of disease pathology  
341 found across different cellular models (Antony et al., 2020; S B Larsen et al., 2018; Mortiboys et al., 2008),  
342 but may also be an indicator of disease severity. The astrocytes carrying the A53T mutation have the most  
343 severe phenotypes across all of the parameters analyzed in this study. In accordance with this finding,  
344 individuals with the A53T mutation manifest PD symptoms approximately a 10-years earlier than carriers  
345 of other missense mutations (Kasten & Klein, 2013). Similarly, carriers of the *SNCA* triplication exhibit  
346 onset of PD symptoms earlier than carriers of *SNCA* duplication, and have more rapid disease progression  
347 (Kasten & Klein, 2013). Thus, the increased mitochondrial fragmentation, pyknotic nuclei and excess of  
348 cytosolic calcium found may all be biomarkers of *SNCA* dosage. Interestingly, the p.A30P line had reduced  
349 mitochondrial branching (form factor) yet no difference in mitochondrial length (aspect ratio), similar to  
350 findings found in idiopathic and familial PD fibroblasts (Antony et al., 2020; Mortiboys et al., 2008); which  
351 may indicate that loss of mitochondrial branching precedes loss of mitochondrial length and can serve as  
352 an indicator of disease severity.

353 The effects of PD mutations on neuronal phenotypes have been studied in patient-derived neurons, but  
354 it remained unclear if these mutations exerted pathological effects on other cell types. Our data show  
355 that astrocytes also possess measurable pathogenic phenotypes in response to PD-causing mutations that  
356 can contribute to the disease pathogenesis. This raises the hypothesis that in the brain, where neurons  
357 and non-neuronal support cells exists in a ratio of 1:1 (Azevedo et al., 2009), dysfunctional glia facilitate  
358 neuronal dysfunction. Furthermore, treatment of dysfunctional glia should be considered as an  
359 intervention strategy in the early stages of PD.

360

#### 361 **Conflict of interest**

362 The authors declare no competing financial interests.

363 **Author contributions**

364 Conceptualization: P.B. (Peter Barbuti) and R.K. (Rejko Krüger); methodology: P.B.; software: P.A. (Paul  
365 Antony); validation: P.B., F.M. (Francois Massart); formal analysis: P.B.; investigation: P.B.; resources: P.B.,  
366 R.K., Gabriella Novak (G.N.), Simone Larsen (S.L.), Clara Berenguer-Escuder (C.B.), Bruno Santos (B.S.),  
367 Dajana Grossmann (D.G.), Takahiro Shiga (T.S.), Kei-ichi Ishikawa (K.I.), Wado Akamatsu (W.A.), Nobutaka  
368 Hattori (N.H.), and Steven Finkbeiner (S.F.); data curation: P.B.; writing—original draft preparation: P.B.;  
369 writing—review and editing: P.B., S.F. and R.K.; visualization: P.B.; supervision: R.K.; project  
370 administration: P.B. and R.K.; funding acquisition: R.K. All authors have read and agreed to the published  
371 version of the manuscript.

372 **Data availability statement**

373 The data that support the findings of this study are available on request from the corresponding author.  
374 The data are not publicly available due to privacy or ethical restrictions.

375 **ORCID**

376 Peter A. Barbuti <https://orcid.org/0000-0001-9182-1629>

377 Paul M.A. Antony <https://orcid.org/0000-0002-0450-9301>,

378 **vii. References;**

379 Antony, P. M. A., Kondratyeva, O., Mommaerts, K., Ostaszewski, M., Sokolowska, K., Baumuratov, A. S.,  
380 ... Diederich, N. J. (2020). Fibroblast mitochondria in idiopathic Parkinson's disease display  
381 morphological changes and enhanced resistance to depolarization. *Scientific Reports*, 10(1), 1569.  
382 <https://doi.org/10.1038/s41598-020-58505-6>

383 Azevedo, F. A. C., Carvalho, L. R. B., Grinberg, L. T., Farfel, J. M., Ferretti, R. E. L., Leite, R. E. P., ...  
384 Herculano-Houzel, S. (2009). Equal numbers of neuronal and nonneuronal cells make the human  
385 brain an isometrically scaled-up primate brain. *Journal of Comparative Neurology*, 513(5), 532–541.  
386 <https://doi.org/10.1002/cne.21974>

387 Bazargani, N., & Attwell, D. (2016). Astrocyte calcium signaling: the third wave. *Nature Neuroscience*,  
388 19(2), 182–189. <https://doi.org/10.1038/nn.4201>

389 Bonni, A., Sun, Y., Nadal-Vicens, M., Bhatt, A., Frank, D. A., Rozovsky, I., ... Greenberg, M. E. (1997).  
390 Regulation of Gliogenesis in the Central Nervous System by the JAK-STAT Signaling Pathway.

- 391 *Science*, 278(5337), 477 LP – 483. <https://doi.org/10.1126/science.278.5337.477>
- 392 Booth, H. D. E., Hirst, W. D., & Wade-Martins, R. (2017). The Role of Astrocyte Dysfunction in Parkinson's  
393 Disease Pathogenesis. *Trends in Neurosciences*, 40(6), 358–370.  
394 <https://doi.org/10.1016/j.tins.2017.04.001>
- 395 Braak, H., Sastre, M., & Del Tredici, K. (2007). Development of  $\alpha$ -synuclein immunoreactive astrocytes in  
396 the forebrain parallels stages of intraneuronal pathology in sporadic Parkinson's disease. *Acta*  
397 *Neuropathologica*, 114(3), 231–241. <https://doi.org/10.1007/s00401-007-0244-3>
- 398 Bradley, R. A., Shireman, J., McFalls, C., Choi, J., Canfield, S. G., Dong, Y., ... Zhang, S.-C. (2019). Regionally  
399 specified human pluripotent stem cell-derived astrocytes exhibit different molecular signatures  
400 and functional properties. *Development*, 146(13), dev170910. <https://doi.org/10.1242/dev.170910>
- 401 Braidy, N., Gai, W.-P., Xu, Y. H., Sachdev, P., Guillemin, G. J., Jiang, X.-M., ... Chan, D. Y. (2013). Uptake  
402 and mitochondrial dysfunction of alpha-synuclein in human astrocytes, cortical neurons and  
403 fibroblasts. *Translational Neurodegeneration*, 2(1), 20. <https://doi.org/10.1186/2047-9158-2-20>
- 404 Caldwell, M. A., Garcion, E., terBorg, M. G., He, X., & Svendsen, C. N. (2004). Heparin stabilizes FGF-2 and  
405 modulates striatal precursor cell behavior in response to EGF. *Experimental Neurology*, 188(2),  
406 408–420. <https://doi.org/10.1016/J.EXPNEUROL.2004.05.007>
- 407 Calì, T., Ottolini, D., Negro, A., & Brini, M. (2012).  $\alpha$ -Synuclein controls mitochondrial calcium  
408 homeostasis by enhancing endoplasmic reticulum-mitochondria interactions. *The Journal of*  
409 *Biological Chemistry*, 287(22), 17914–17929. <https://doi.org/10.1074/jbc.M111.302794>
- 410 Cavaliere, F., Cerf, L., Dehay, B., Ramos-Gonzalez, P., De Giorgi, F., Bourdenx, M., ... Bezard, E. (2017). In  
411 vitro  $\alpha$ -synuclein neurotoxicity and spreading among neurons and astrocytes using Lewy body  
412 extracts from Parkinson disease brains. *Neurobiology of Disease*, 103, 101–112.  
413 <https://doi.org/10.1016/j.nbd.2017.04.011>
- 414 Chartier-Harlin, M.-C., Kachergus, J., Roumier, C., Mouroux, V., Douay, X., Lincoln, S., ... Destée, A.  
415 (2004). Alpha-synuclein locus duplication as a cause of familial Parkinson's disease. *Lancet (London,*  
416 *England)*, 364(9440), 1167–1169. [https://doi.org/10.1016/S0140-6736\(04\)17103-1](https://doi.org/10.1016/S0140-6736(04)17103-1)
- 417 Chiba-Falek, O., Lopez, G. J., & Nussbaum, R. L. (2006). Levels of alpha-synuclein mRNA in sporadic  
418 Parkinson disease patients. *Movement Disorders*, 21(10), 1703–1708.

- 419 <https://doi.org/10.1002/mds.21007>
- 420 di Domenico, A., Carola, G., Calatayud, C., Pons-Espinal, M., Muñoz, J. P., Richaud-Patin, Y., ... Consiglio,  
421 A. (2019). Patient-Specific iPSC-Derived Astrocytes Contribute to Non-Cell-Autonomous  
422 Neurodegeneration in Parkinson's Disease. *Stem Cell Reports*, 12(2), 213–229.  
423 <https://doi.org/https://doi.org/10.1016/j.stemcr.2018.12.011>
- 424 Edwards, T. L., Scott, W. K., Almonte, C., Burt, A., Powell, E. H., Beecham, G. W., ... Martin, E. R. (2010).  
425 Genome-Wide Association Study Confirms SNPs in SNCA and the MAPT Region as Common Risk  
426 Factors for Parkinson Disease. *Annals of Human Genetics*, 74(2), 97–109.  
427 <https://doi.org/10.1111/j.1469-1809.2009.00560.x>
- 428 Eroglu, C., & Barres, B. A. (2010). Regulation of synaptic connectivity by glia. *Nature*, 468(7321), 223–  
429 231. <https://doi.org/10.1038/nature09612>
- 430 Fearnley, J. M., & Lees, A. J. (1991). Ageing and Parkinson'S Disease: Substantia Nigra Regional  
431 Selectivity. *Brain*, 114(5), 2283–2301. <https://doi.org/10.1093/brain/114.5.2283>
- 432 Granatiero, V., Pacifici, M., Raffaello, A., De Stefani, D., & Rizzuto, R. (2019). Overexpression of  
433 Mitochondrial Calcium Uniporter Causes Neuronal Death. *Oxidative Medicine and Cellular  
434 Longevity*, 2019, 1681254. <https://doi.org/10.1155/2019/1681254>
- 435 Gstraunthaler, G., Lindl, T., & Valk, J. B. F. (2013). A plea to reduce or replace fetal bovine serum in cell  
436 culture media. *Cytotechnology*, 65. <https://doi.org/10.1007/s10616-013-9633-8>
- 437 Guardia-Laguarta, C., Area-Gomez, E., Rub, C., Liu, Y., Magrane, J., Becker, D., ... Przedborski, S. (2014). -  
438 Synuclein Is Localized to Mitochondria-Associated ER Membranes. *Journal of Neuroscience*, 34(1),  
439 249–259. <https://doi.org/10.1523/JNEUROSCI.2507-13.2014>
- 440 Harada, K., Kamiya, T., & Tsuboi, T. (2016). Gliotransmitter release from astrocytes: functional,  
441 developmental and pathological implications in the brain . *Frontiers in Neuroscience* . Retrieved  
442 from <https://www.frontiersin.org/article/10.3389/fnins.2015.00499>
- 443 Kamp, F., Exner, N., Lutz, A. K., Wender, N., Hegermann, J., Brunner, B., ... Haass, C. (2010). Inhibition of  
444 mitochondrial fusion by  $\alpha$ -synuclein is rescued by PINK1, Parkin and DJ-1. *The EMBO Journal*,  
445 29(20), 3571–3589. <https://doi.org/10.1038/emboj.2010.223>
- 446 Kasten, M., & Klein, C. (2013). The many faces of alpha-synuclein mutations. *Movement Disorders*, 28(6),



- 447 697–701. <https://doi.org/10.1002/mds.25499>
- 448 Kiely, A. P., Asi, Y. T., Kara, E., Limousin, P., Ling, H., Lewis, P., ... Holton, J. L. (2013).  $\alpha$ -Synucleinopathy  
449 associated with G51D SNCA mutation: a link between Parkinson's disease and multiple system  
450 atrophy? *Acta Neuropathologica*, *125*(5), 753–769. <https://doi.org/10.1007/s00401-013-1096-7>
- 451 Krüger, R., Kuhn, W., Müller, T., Voitalla, D., Graeber, M., Kösel, S., ... Riess, O. (1998). Ala30Pro  
452 mutation in the gene encoding alpha-synuclein in Parkinson's disease. *Nature Genetics*, *18*(2), 106–  
453 108. <https://doi.org/10.1038/ng0298-106>
- 454 Kuchibhotla, K. V., Lattarulo, C. R., Hyman, B. T., & Bacskai, B. J. (2009). Synchronous hyperactivity and  
455 intercellular calcium waves in astrocytes in Alzheimer mice. *Science*, *323*(5918), 1211–1215.  
456 <https://doi.org/10.1126/science.1169096>
- 457 Larsen, S B, Hanss, Z., & Krüger, R. (2018). The genetic architecture of mitochondrial dysfunction in  
458 Parkinson's disease. *Cell and Tissue Research*, *373*(1), 21–37. <https://doi.org/10.1007/s00441-017-2768-8>
- 460 Larsen, Simone B, Hanss, Z., Cruciani, G., Massart, F., Barbuti, P. A., Mellick, G., & Krüger, R. (2020).  
461 Induced pluripotent stem cell line (LCSBi001-A) derived from a patient with Parkinson's disease  
462 carrying the p.D620N mutation in VPS35. *Stem Cell Research*, 101776.  
463 <https://doi.org/https://doi.org/10.1016/j.scr.2020.101776>
- 464 Lautenschläger, J., Stephens, A. D., Fusco, G., Ströhl, F., Curry, N., Zacharopoulou, M., ... Schierle, G. S. K.  
465 (2018). C-terminal calcium binding of  $\alpha$ -synuclein modulates synaptic vesicle interaction. *Nature*  
466 *Communications*, *9*(1), 712. <https://doi.org/10.1038/s41467-018-03111-4>
- 467 Lee, H.-J., Suk, J.-E., Patrick, C., Bae, E.-J., Cho, J.-H., Rho, S., ... Lee, S.-J. (2010). Direct Transfer of  $\alpha$ -  
468 Synuclein from Neuron to Astroglia Causes Inflammatory Responses in Synucleinopathies. *Journal*  
469 *of Biological Chemistry*, *285*(12), 9262–9272. <https://doi.org/10.1074/jbc.m109.081125>
- 470 Lee, H. J., Dreyfus, C., & DiCicco-Bloom, E. (2016). Valproic acid stimulates proliferation of glial  
471 precursors during cortical gliogenesis in developing rat. *Developmental Neurobiology*, *76*(7), 780–  
472 798. <https://doi.org/10.1002/dneu.22359>
- 473 Lee, S. M., Danielian, P. S., Fritsch, B., & McMahon, A. P. (1997). Evidence that FGF8 signalling from the  
474 midbrain-hindbrain junction regulates growth and polarity in the developing midbrain.

- 475           *Development*, 124(5), 959 LP – 969. Retrieved from  
476           <http://dev.biologists.org/content/124/5/959.abstract>
- 477 Lesage, S., Anheim, M., Letournel, F., Bousset, L., Honoré, A., Rozas, N., ... Brice, A. (2013). G51D  $\alpha$ -  
478           synuclein mutation causes a novel Parkinsonian-pyramidal syndrome. *Annals of Neurology*, 73(4),  
479           459–471. <https://doi.org/10.1002/ana.23894>
- 480 Liddelow, S. A., Guttenplan, K. A., Clarke, L. E., Bennett, F. C., Bohlen, C. J., Schirmer, L., ... Barres, B. A.  
481           (2017). Neurotoxic reactive astrocytes are induced by activated microglia. *Nature*, 541(7638), 481–  
482           487. <https://doi.org/10.1038/nature21029>
- 483 Liu, B., & Neufeld, A. H. (2007). Activation of epidermal growth factor receptors in astrocytes: From  
484           development to neural injury. *Journal of Neuroscience Research*, 85(16), 3523–3529.  
485           <https://doi.org/10.1002/jnr.21364>
- 486 Magistri, M., Khoury, N., Mazza, E. M. C., Velmeshev, D., Lee, J. K., Biciato, S., ... Faghihi, M. A. (2016). A  
487           comparative transcriptomic analysis of astrocytes differentiation from human neural progenitor  
488           cells. *European Journal of Neuroscience*, 44(10), 2858–2870. <https://doi.org/10.1111/ejn.13382>
- 489 Markopoulou, K., Dickson, D. W., McComb, R. D., Wszolek, Z. K., Katechalidou, L., Avery, L., ... Chase, B.  
490           A. (2008). Clinical, neuropathological and genotypic variability in SNCA A53T familial Parkinson's  
491           disease. *Acta Neuropathologica*, 116(1), 25–35. <https://doi.org/10.1007/s00401-008-0372-4>
- 492 Moein, M., Grzyb, K., Gonçalves Martins, T., Komoto, S., Peri, F., Crawford, A. D., ... Skupin, A. (2018).  
493           CaSiAn: a Calcium Signaling Analyzer tool. *Bioinformatics*, 34(17), 3052–3054.  
494           <https://doi.org/10.1093/bioinformatics/bty281>
- 495 Morel, L., Chiang, M. S. R., Higashimori, H., Shoneye, T., Iyer, L. K., Yelick, J., ... Yang, Y. (2017). Molecular  
496           and Functional Properties of Regional Astrocytes in the Adult Brain. *The Journal of Neuroscience*,  
497           37(36), 8706 LP – 8717. <https://doi.org/10.1523/JNEUROSCI.3956-16.2017>
- 498 Mortiboys, H., Thomas, K. J., Koopman, W. J. H., Klaffke, S., Abou-Sleiman, P., Olpin, S., ... Bandmann, O.  
499           (2008). Mitochondrial function and morphology are impaired in parkin-mutant fibroblasts. *Annals*  
500           *of Neurology*, 64(5), 555–565. <https://doi.org/10.1002/ana.21492>
- 501 Nakamura, K., Nemani, V. M., Azarbal, F., Skibinski, G., Levy, J. M., Egami, K., ... Edwards, R. H. (2011).  
502           Direct membrane association drives mitochondrial fission by the Parkinson disease-associated

- 503 protein alpha-synuclein. *The Journal of Biological Chemistry*, 286(23), 20710–20726.  
504 <https://doi.org/10.1074/jbc.M110.213538>
- 505 Pasanen, P., Myllykangas, L., Siitonen, M., Raunio, A., Kaakkola, S., Lyytinen, J., ... Paetau, A. (2014).  
506 Novel  $\alpha$ -synuclein mutation A53E associated with atypical multiple system atrophy and Parkinson's  
507 disease-type pathology. *Neurobiology of Aging*, 35(9), 2180.e1-5.  
508 <https://doi.org/10.1016/j.neurobiolaging.2014.03.024>
- 509 Perriot, S., Mathias, A., Perriard, G., Canales, M., Jonkmans, N., Merienne, N., ... Du Pasquier, R. (2018).  
510 Human Induced Pluripotent Stem Cell-Derived Astrocytes Are Differentially Activated by Multiple  
511 Sclerosis-Associated Cytokines. *Stem Cell Reports*, 11(5), 1199–1210.  
512 <https://doi.org/10.1016/J.STEMCR.2018.09.015>
- 513 Pihlstrøm, L., Blauwendraat, C., Cappelletti, C., Berge-Seidl, V., Langmyhr, M., Henriksen, S. P., ... Toft, M.  
514 (2018). A comprehensive analysis of SNCA-related genetic risk in sporadic parkinson disease.  
515 *Annals of Neurology*, 84(1), 117–129. <https://doi.org/10.1002/ana.25274>
- 516 Pinkas-Kramarski, R., Eilam, R., Spiegler, O., Lavi, S., Liu, N., Chang, D., ... Yarden, Y. (1994). Brain neurons  
517 and glial cells express Neu differentiation factor/heregulin: a survival factor for astrocytes.  
518 *Proceedings of the National Academy of Sciences*, 91(20), 9387 LP – 9391.  
519 <https://doi.org/10.1073/pnas.91.20.9387>
- 520 Polymeropoulos, M. H., Lavedan, C., Leroy, E., Ide, S. E., Dehejia, A., Dutra, A., ... Nussbaum, R. L. (1997).  
521 Mutation in the alpha-synuclein gene identified in families with Parkinson's disease. *Science (New*  
522 *York, N.Y.)*, 276(5321), 2045–2047. <https://doi.org/10.1126/SCIENCE.276.5321.2045>
- 523 Reinhardt, P., Glatza, M., Hemmer, K., Tsytsyura, Y., Thiel, C. S., Höing, S., ... Sternecker, J. (2013).  
524 Derivation and Expansion Using Only Small Molecules of Human Neural Progenitors for  
525 Neurodegenerative Disease Modeling. *PLoS ONE*, 8(3).  
526 <https://doi.org/10.1371/journal.pone.0059252>
- 527 Rincón Castro, L. M., Gallant, M., & Niles, L. P. (2005). Novel targets for valproic acid: up-regulation of  
528 melatonin receptors and neurotrophic factors in C6 glioma cells. *Journal of Neurochemistry*, 95(5),  
529 1227–1236. <https://doi.org/10.1111/j.1471-4159.2005.03457.x>
- 530 Rostami, J., Holmqvist, S., Lindström, V., Sigvardson, J., Westermark, G. T., Ingelsson, M., ... Erlandsson,  
531 A. (2017). Human Astrocytes Transfer Aggregated Alpha-Synuclein via Tunneling Nanotubes. *The*

- 532 *Journal of Neuroscience*, 37(49), 11835 LP – 11853. <https://doi.org/10.1523/JNEUROSCI.0983->  
533 17.2017
- 534 Roybon, L., Lamas, N. J., Garcia-Diaz, A., Yang, E. J., Sattler, R., Jackson-Lewis, V., ... Henderson, C. E.  
535 (2013). Human Stem Cell-Derived Spinal Cord Astrocytes with Defined Mature or Reactive  
536 Phenotypes. *Cell Reports*, 4(5), 1035–1048. <https://doi.org/10.1016/j.celrep.2013.06.021>
- 537 Schapira, A. H. V. (2013). Calcium dysregulation in Parkinson's disease. *Brain*, 136(7), 2015–2016.  
538 <https://doi.org/10.1093/brain/awt180>
- 539 Schindelin, J., Arganda-Carreras, I., Frise, E., Kaynig, V., Longair, M., Pietzsch, T., ... Cardona, A. (2012).  
540 Fiji: an open-source platform for biological-image analysis. *Nature Methods*, 9(7), 676–682.  
541 <https://doi.org/10.1038/nmeth.2019>
- 542 Schneider, C. A., Rasband, W. S., & Eliceiri, K. W. (2012). NIH Image to ImageJ: 25 years of image  
543 analysis. *Nature Methods*, 9(7), 671–675. <https://doi.org/10.1038/nmeth.2089>
- 544 Seidel, K., Schöls, L., Nuber, S., Petrasch-Parwez, E., Gierga, K., Wszolek, Z., ... Krüger, R. (2010). First  
545 appraisal of brain pathology owing to A30P mutant alpha-synuclein. *Annals of Neurology*, 67(5),  
546 684–689. <https://doi.org/10.1002/ana.21966>
- 547 Shahmoradian, S. H., Lewis, A. J., Genoud, C., Hench, J., Moors, T. E., Navarro, P. P., ... Lauer, M. E.  
548 (2019). Lewy pathology in Parkinson's disease consists of crowded organelles and lipid membranes.  
549 *Nature Neuroscience*, 22(7), 1099–1109. <https://doi.org/10.1038/s41593-019-0423-2>
- 550 Singleton, A. B., Farrer, M., Johnson, J., Singleton, A., Hague, S., Kachergus, J., ... Gwinn-Hardy, K. (2003).  
551 alpha-Synuclein locus triplication causes Parkinson's disease. *Science (New York, N.Y.)*, 302(5646),  
552 841. <https://doi.org/10.1126/science.1090278>
- 553 Song, Y. J. C., Halliday, G. M., Holton, J. L., Lashley, T., O'Sullivan, S. S., McCann, H., ... Revesz, T. R.  
554 (2009). Degeneration in Different Parkinsonian Syndromes Relates to Astrocyte Type and Astrocyte  
555 Protein Expression. *Journal of Neuropathology & Experimental Neurology*, 68(10), 1073–1083.  
556 <https://doi.org/10.1097/NEN.0b013e3181b66f1b>
- 557 Sorrentino, Z. A., Giasson, B. I., & Chakrabarty, P. (2019).  $\alpha$ -Synuclein and astrocytes: tracing the  
558 pathways from homeostasis to neurodegeneration in Lewy body disease. *Acta Neuropathologica*,  
559 138(1), 1–21. <https://doi.org/10.1007/s00401-019-01977-2>

560 Spillantini, M. G., Crowther, R. A., Jakes, R., Hasegawa, M., & Goedert, M. (1998).  $\alpha$ -Synuclein in  
561 filamentous inclusions of Lewy bodies from Parkinson's disease and dementia with Lewy bodies.  
562 *Proceedings of the National Academy of Sciences*, 95(11).

563 von Bartheld, C. S., Bahney, J., & Herculano-Houzel, S. (2016). The search for true numbers of neurons  
564 and glial cells in the human brain: A review of 150 years of cell counting. *Journal of Comparative*  
565 *Neurology*, 524(18), 3865–3895. <https://doi.org/10.1002/cne.24040>

566 Wakabayashi, K., Hayashi, S., Yoshimoto, M., Kudo, H., & Takahashi, H. (2000). NACP/ $\alpha$ -synuclein-  
567 positive filamentous inclusions in astrocytes and oligodendrocytes of Parkinson's disease brains.  
568 *Acta Neuropathologica*, 99(1), 14–20. <https://doi.org/10.1007/PL00007400>

569 Zambon, F., Cherubini, M., Fernandes, H. J. R., Lang, C., Ryan, B. J., Volpato, V., ... Wade-Martins, R.  
570 (2019). Cellular  $\alpha$ -synuclein pathology is associated with bioenergetic dysfunction in Parkinson's  
571 iPSC-derived dopamine neurons. *Human Molecular Genetics*, 28(12), 2001–2013.  
572 <https://doi.org/10.1093/hmg/ddz038>

573 Zarranz, J. J., Alegre, J., Gómez-Esteban, J. C., Lezcano, E., Ros, R., Ampuero, I., ... de Yebenes, J. G.  
574 (2004). The new mutation, E46K, of  $\alpha$ -synuclein causes parkinson and Lewy body dementia. *Annals*  
575 *of Neurology*, 55(2), 164–173. <https://doi.org/10.1002/ana.10795>

576 Zhang, Y., Sloan, S. A., Clarke, L. E., Caneda, C., Plaza, C. A., Blumenthal, P. D., ... Barres, B. A. (2016).  
577 Purification and Characterization of Progenitor and Mature Human Astrocytes Reveals  
578 Transcriptional and Functional Differences with Mouse. *Neuron*, 89(1), 37–53.  
579 <https://doi.org/10.1016/j.NEURON.2015.11.013>

580  
581  
582  
583  
584  
585  
586

587 **viii. Tables (each table complete with title and footnotes);**

588 Table 1: Summary of patient-derived cell lines used in this study

| Cell name    | Status  | Gender | Age at Biopsy | Age of onset | Reprogramming method | Mutation                            |
|--------------|---------|--------|---------------|--------------|----------------------|-------------------------------------|
| Ctrl 16      | Control | Male   | 72            | -            | Sendai               | -                                   |
| Ctrl 17      | Control | Male   | 67            | -            | Lentivirus           | -                                   |
| Ctrl 18      | Control | Female | 72            | -            | Sendai               | -                                   |
| A30P         | PD      | Male   | 67            | 55           | Lentivirus           | c.88G>C p.A30P <i>SNCA</i>          |
| A53T         | PD      | Female | 51            | 39           | Sendai               | c.157G>A p.A53T <i>SNCA</i>         |
| Duplication  | PD      | Female | 67            | 48           | Sendai               | <i>SNCA</i> gene locus duplication  |
| Triplication | PD      | Female | 55            | 50           | Sendai               | <i>SNCA</i> gene locus triplication |

589 Table 2: Summary of mitochondrial morphology and cell death analysis in the patient-derived astrocytes harbouring mutations in *SNCA*. A minimum of ten aleatory fields per replicate were acquired for each condition using the 63x objective as Z-stacks. The obtained images were analyzed using a Matlab script capable of analyzing 3D nuclear staining and 3D mitochondrial networks that has been previously reported (Antony et al., 2020). Statistical analysis was performed using a one-way ANOVA with Dunnett's multiple comparison post-hoc test. \*\*\*\*p<0.0001, \*\*\*p<0.0005, \*\*p<0.001 \*p<0.05.

|                  | Patient-derived Astrocytes DIV90 | Direction vs controls | A30P | A53T | Duplication | Triplication |
|------------------|----------------------------------|-----------------------|------|------|-------------|--------------|
| Fragmentation 2D | Mean_FormFactor                  | Decreased             | ***  | **** | **          | **           |
|                  | Mean_Aspect Ratio                | Decreased             |      | **** | ****        | ****         |
|                  | Mitochondrial number             | Decreased             |      | **** |             | **           |
| Fragmentation 3D | MitoPerimeterProprtion_Norm      | Decreased             | ***  | **   | *           | ***          |
|                  | MitoShapeByPerimeter_Norm        | Increased             | ***  | **   | *           | ***          |
|                  | MitoSkelProportion_Norm          | Decreased             |      | ***  | *           | *            |
|                  | MitoErosionBodies_Norm           | Decreased             |      | *    | *           | ****         |
| Pyknosis         | PyknosisMetric_Norm              | Increased             |      | **** | *           | ***          |

590 **ix. Figure legends;**

591 Figure 1: Differentiation and characterisation of midbrain astrocytes from human iPSCs via a NPC state.  
 592 **(A)** An overview of the NPC generation and directed astrocyte differentiation protocol. **(B)** Quantitative  
 593 analysis of astrocyte marker proteins using flow cytometry. Astrocytes were differentiated for 30 and 90  
 594 days. A 2-way ANOVA was used with Tukey multiple comparison post-hoc test: \*\*\*\*p<0.0001,  
 595 \*\*\*p<0.0002. **(C)** Relative gene expression of astrocytes normalized to B-actin. Astrocytes were  
 596 differentiated for 120 DIV; the neurons were differentiated for 45 DIV according to Reinhardt et al.  
 597 (Astrocytes, n=3 cell lines; Neurons, n=4 cell lines; an unpaired t test was used with a two-tailed P value:  
 598 \*\*\*\*p<0.0001, \*\*p=0.0025, \*p=0.0272) **(D)** Triple immunofluorescence labelling of astrocytes expressing  
 599 pan astrocytic and midbrain specific markers. Astrocytes were differentiated for 140 days with  
 600 representative images shown.

601 Figure 2: Altered distribution of alpha-synuclein in patient-derived astrocytes. **(A)** Normalized immunoblot  
 602 data show detectable level of alpha-synuclein in patient-derived astrocytes. **(B)** Immunostaining showing  
 603 colocalisation of alpha-synuclein protein with GFAP<sup>+</sup> astrocytes in the control and patient cell lines. The

604 white arrowheads in the A30P, A53T and Triplication astrocytes samples show aggregated alpha-  
605 synuclein.

606 Figure 3: Assessment of cytosolic Ca<sup>2+</sup> in patient-derived midbrain astrocytes harbouring *SNCA* mutations.  
607 **(A)** Calcium waves recorded over 10 minutes at 37°C using the cytosolic calcium tracer Fluo-4 AM at d90  
608 of differentiation (n=3). **(B)** The Calcium Signal Analyser software (CaSiAn) was used to quantify the  
609 calcium waves with the red triangles corresponding to the identified peaks and the green triangles the  
610 nadirs. The measurable parameters: **(C)** Spike amplitude, **(D)** Average calcium releasing rate, and **(E)** Spike  
611 triangle were quantified using an unpaired one-way ANOVA with Dunnett's multiple comparison post-hoc  
612 test: \*\*\*\*p<0.0001, \*\*\*p<0.0005. All data expressed as mean ± SD.

613 Figure 4: Assessment of fragmented mitochondria in astrocytes harbouring pathogenic mutations in *SNCA*  
614 after 90 days of directed differentiation (n=3). Patient-derived astrocytes containing mutations in *SNCA*  
615 have more fragmented mitochondria than the unaffected controls assessed by **(A)** Form factor, **(B)** Aspect  
616 ratio and **(C)** Mitochondrial number. A minimum of ten aleatory fields were acquired for each condition  
617 using the 63x objective as Z-stacks (n=3). The obtained images were analysed using an in-house developed  
618 Matlab script capable of analysing mitochondrial 3D networks and 3D nuclear staining. **(D)** For assessment  
619 of 2D fragmentation parameters, a maximum intensity projection was used with a representative example  
620 for each cell line shown. Statistics was performed using a one-way ANOVA with Dunnett's multiple  
621 comparison post-hoc test: \*\*p<0.001, \*\*\*\*p<0.0001.

622 Figure 5: Mitochondrial bioenergetics of patient-derived astrocytes harbouring pathogenic mutations in  
623 *SNCA* undergoing a mitochondrial stress test. Detection of mitochondrial respiration via **(A)** oxygen  
624 consumption rate (OCR) or **(B)** extracellular acidification rate (ECAR) under basal conditions and following  
625 the treatments of the ATP synthase inhibitor Oligomycin (O, 1uM), the oxidative phosphorylation  
626 uncoupler FCCP (F, 500nM), and the electron transport chain inhibitors Rotenone (Complex I) and  
627 Antimycin A (Complex III) (R&A, 10uM). The cumulative OCR or ECAR profile is shown of astrocytes  
628 differentiated for 60 days of differentiation (n=3). The combined profiles are plotted as mean for visual  
629 clarity. A two-way ANOVA was performed with Dunnett's post-hoc test: \*\*\*\*p<0.0001, \*p=0.0124. The  
630 rates of **(C)** basal respiration, **(D)** maximum respiration **(E)** spare respiratory capacity (%), **(F)** non-  
631 mitochondrial oxygen consumption, **(G)** ATP production and **(H)** proton leak were calculated using a one-  
632 way ANOVA using Tukey post-hoc test. \*\*\*\*p<0.0001, \*\*\*p<0.002, \*\*p<0.005, \*p<0.001.

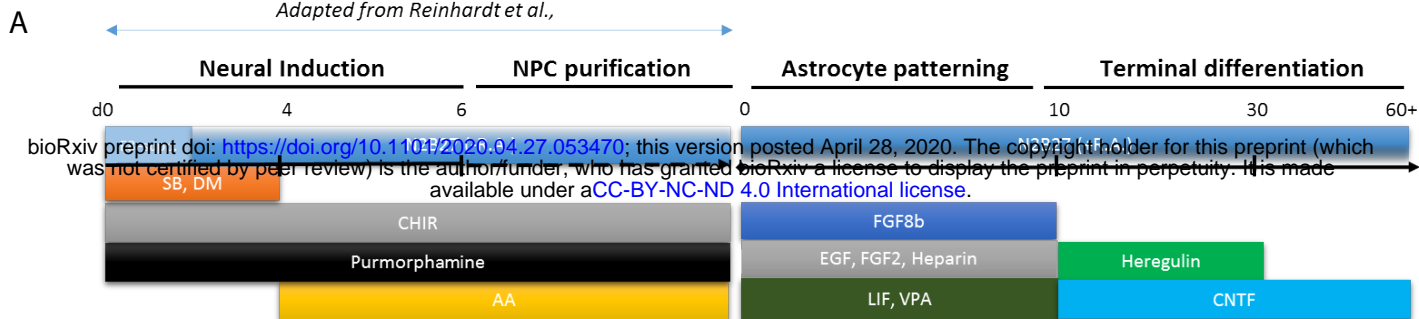

bioRxiv preprint doi: <https://doi.org/10.1101/2020.04.27.053470>; this version posted April 28, 2020. The copyright holder for this preprint (which was not certified by peer review) is the author/funder, who has granted bioRxiv a license to display the preprint in perpetuity. It is made available under aCC-BY-NC-ND 4.0 International license.

**B** Flow Cytometry analysis of astrocyte markers

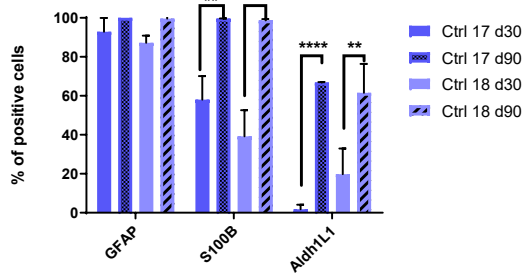

**C** Astrocyte v Neuron gene expression

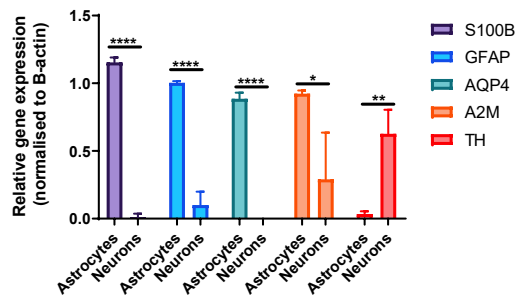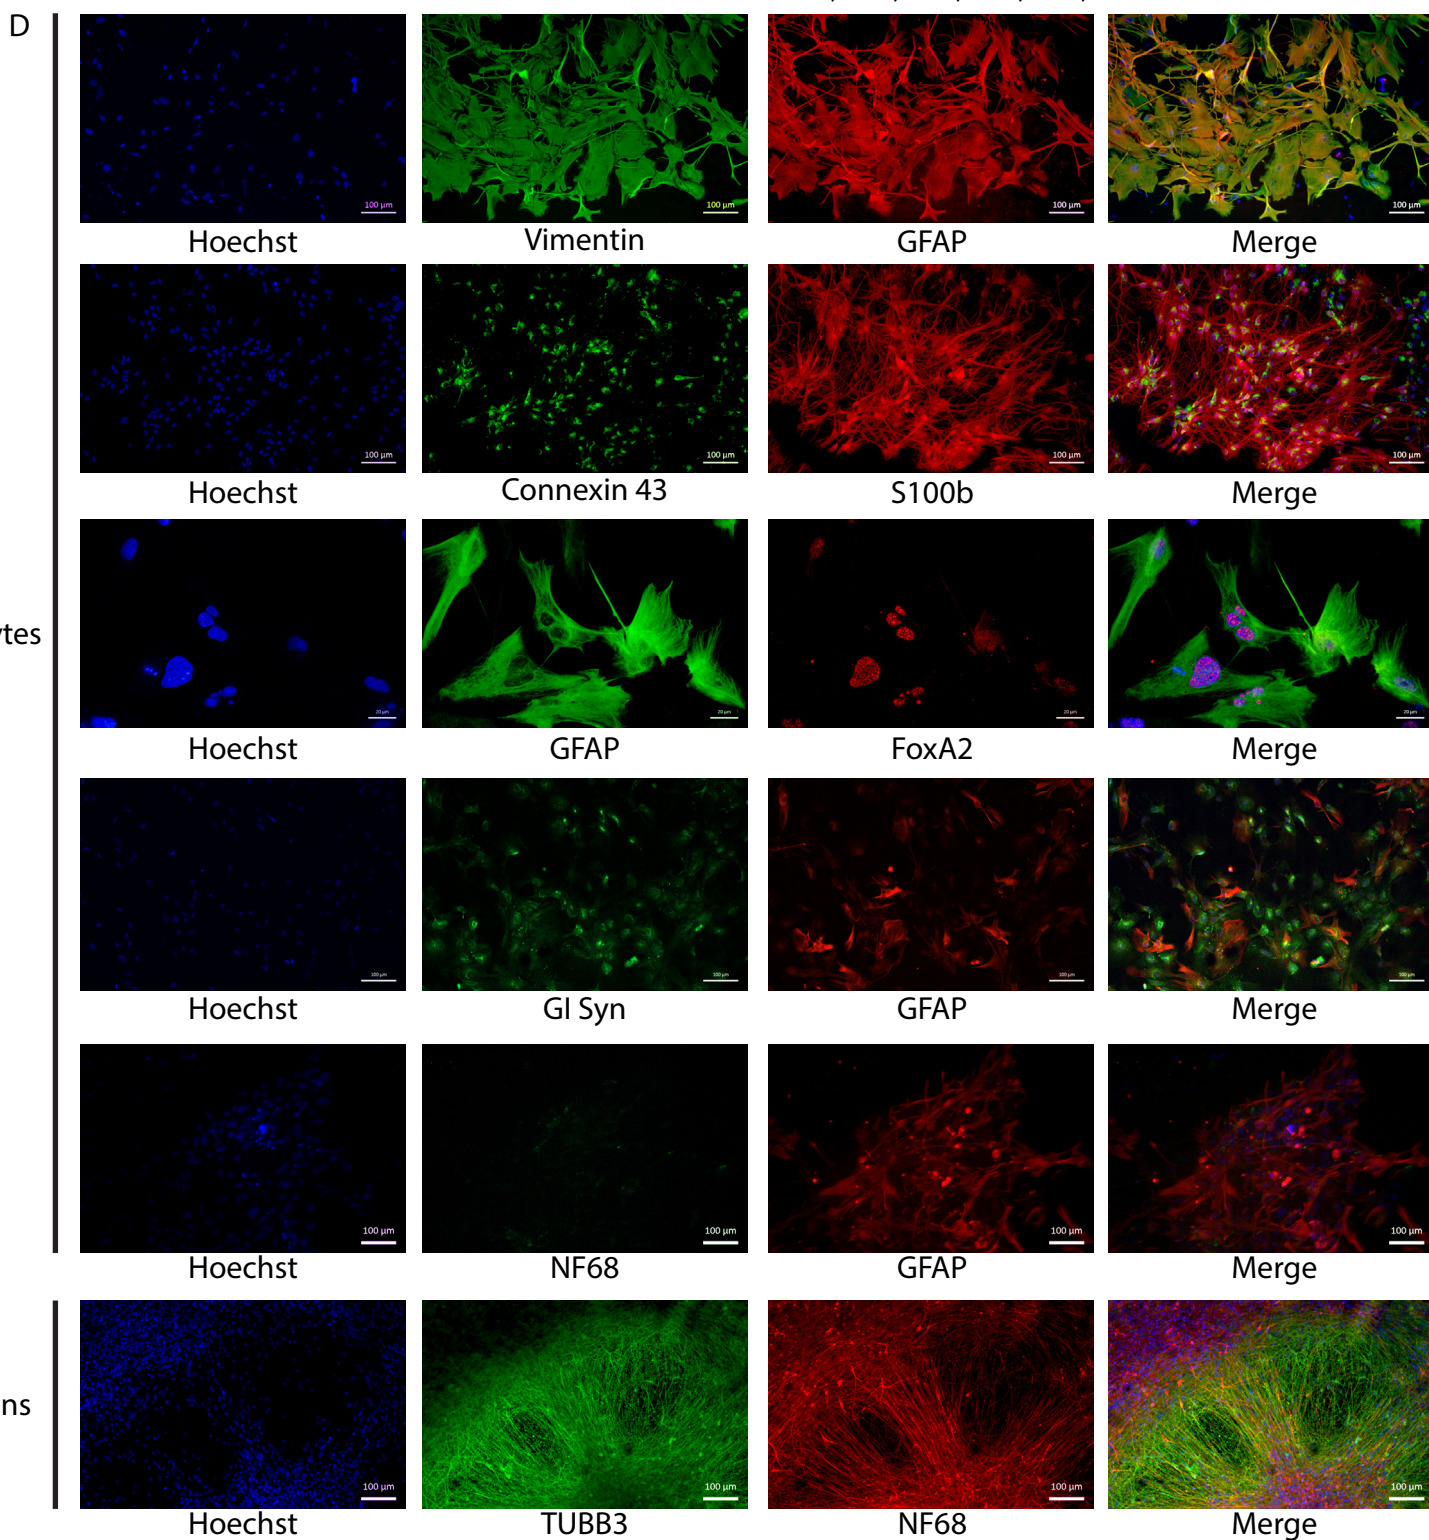



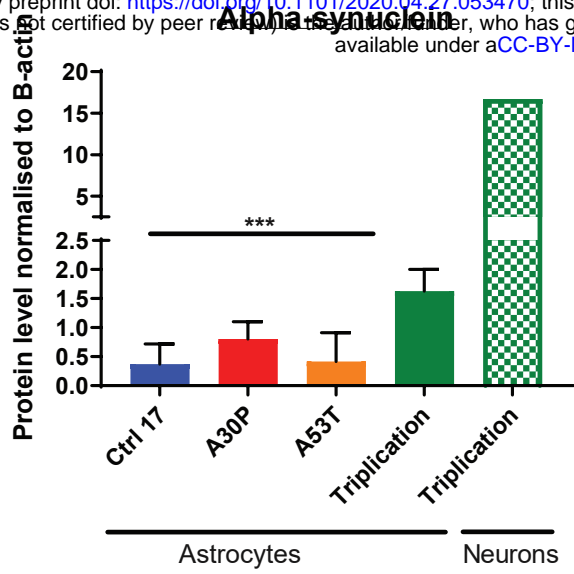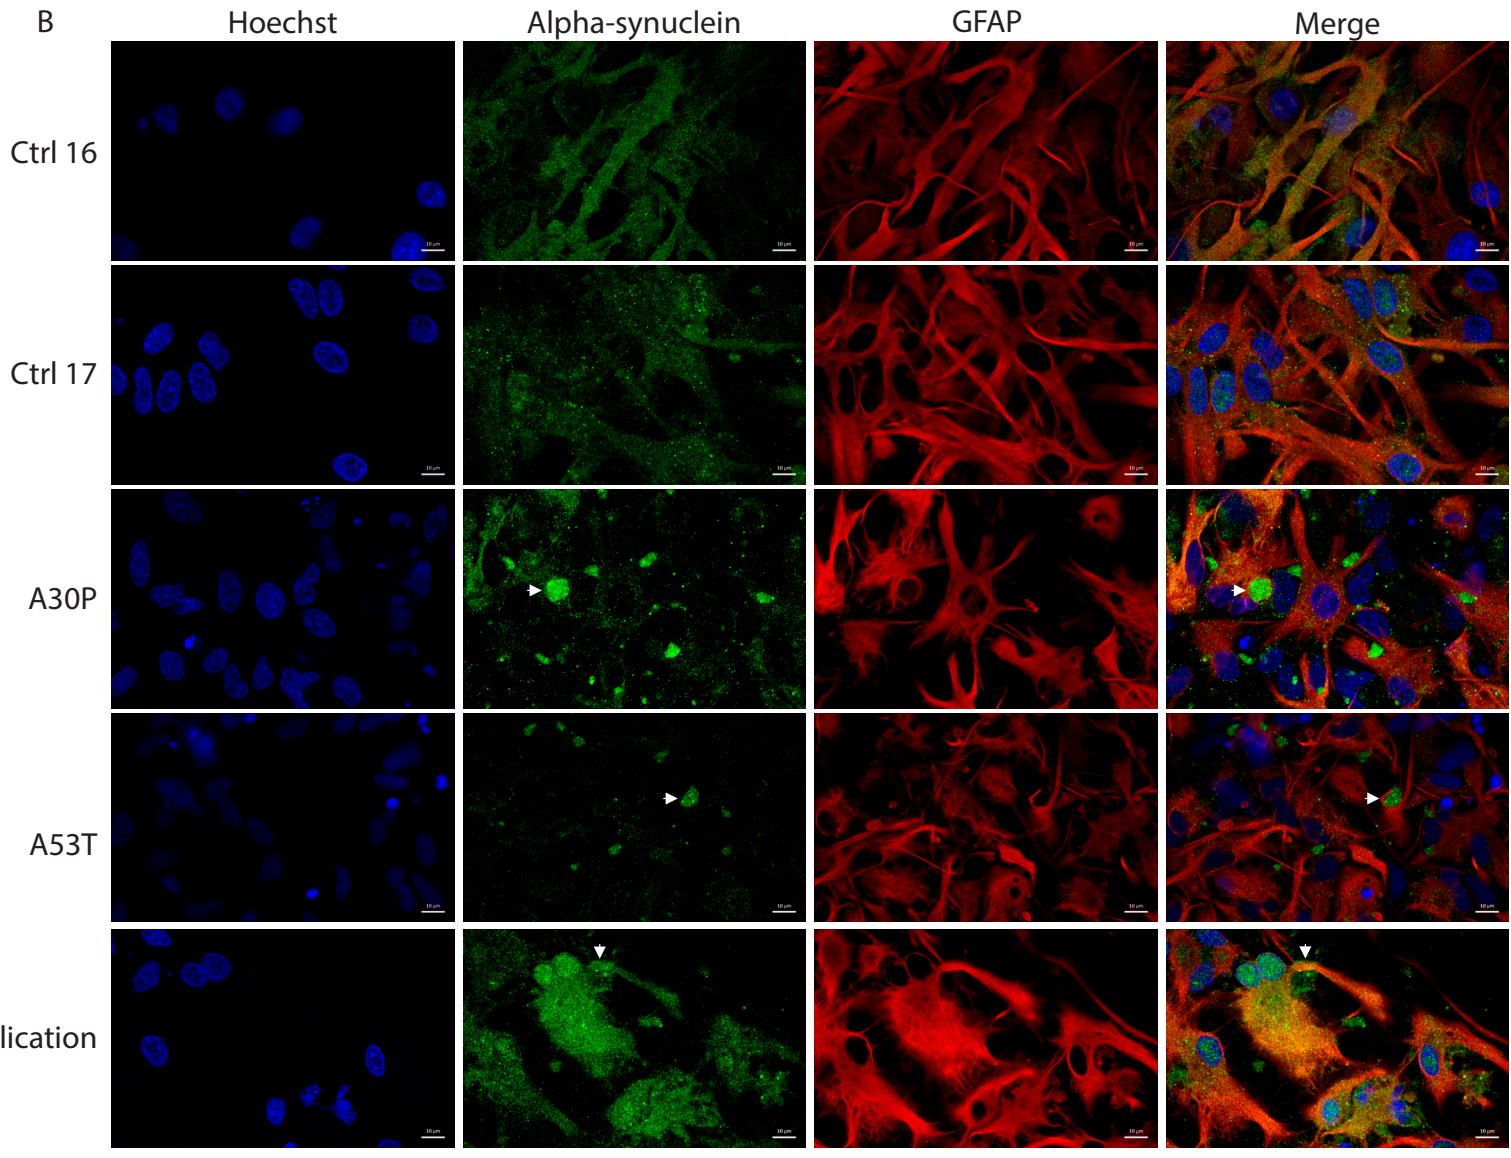

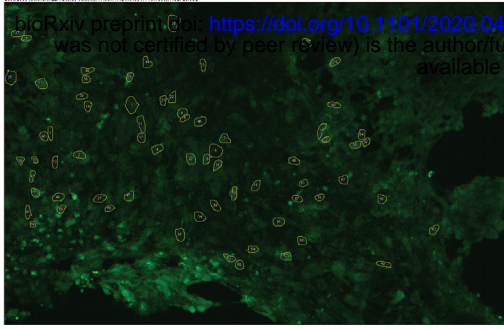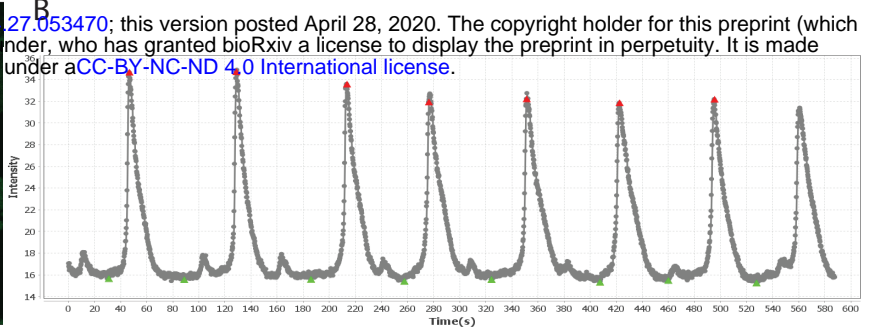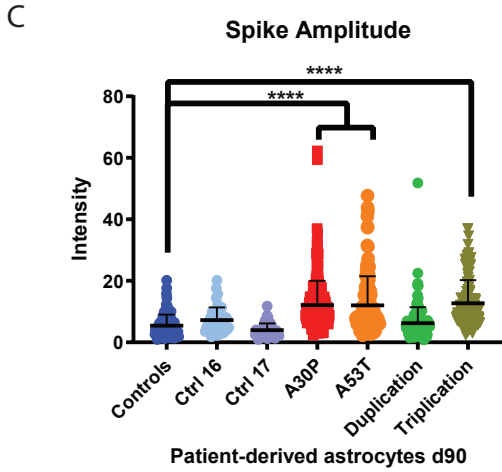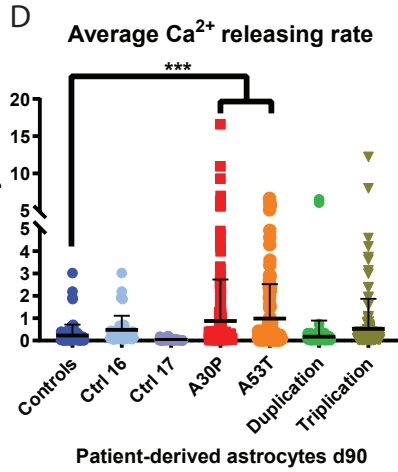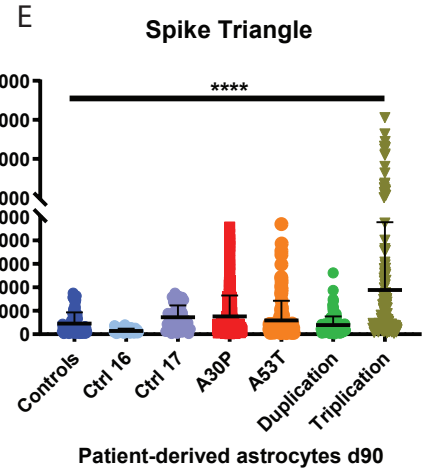

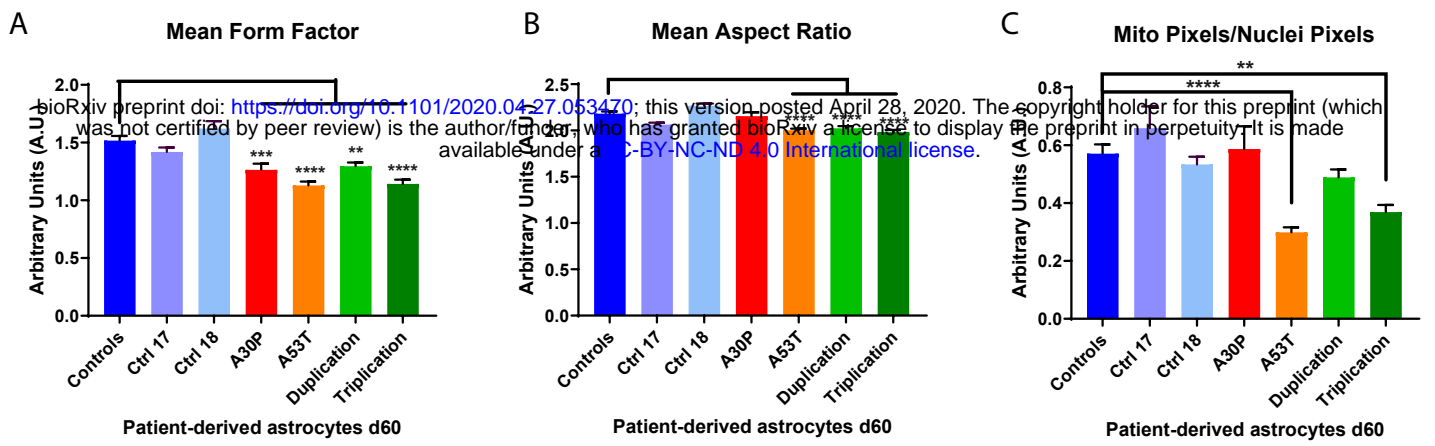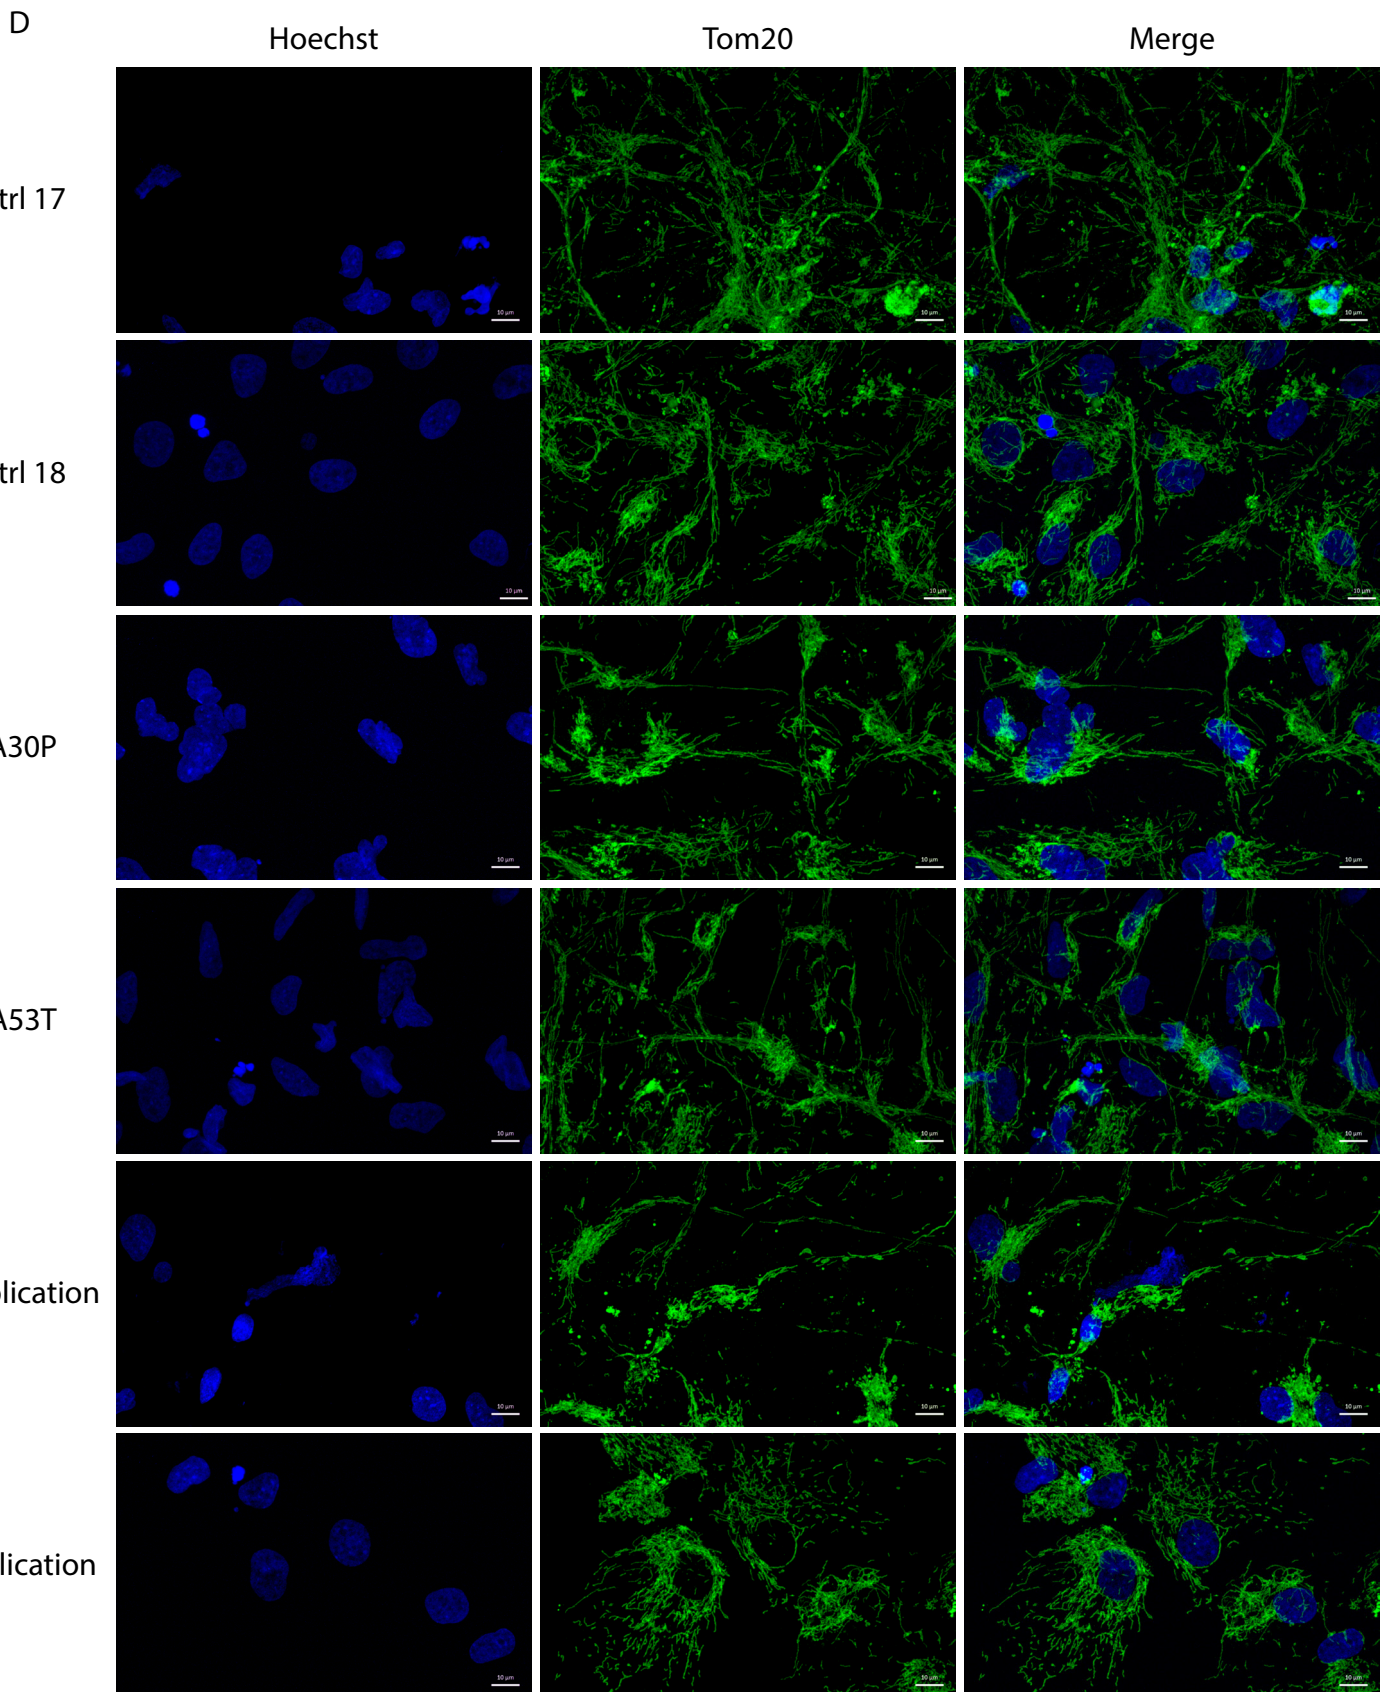

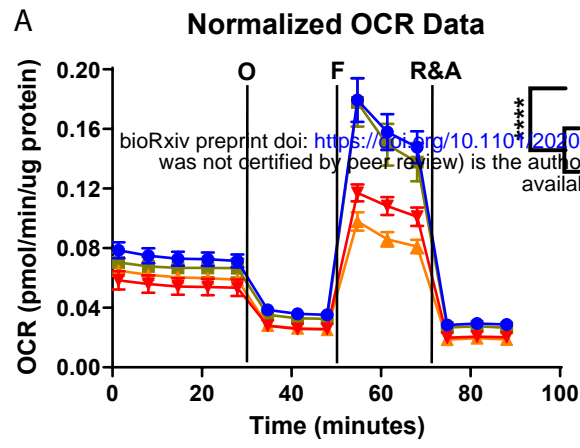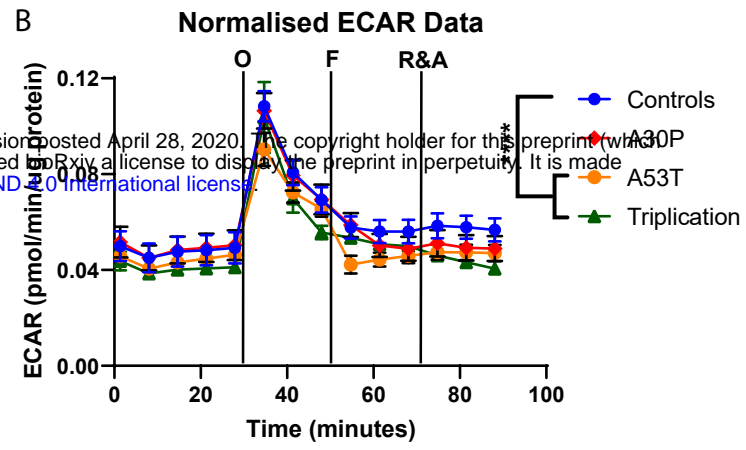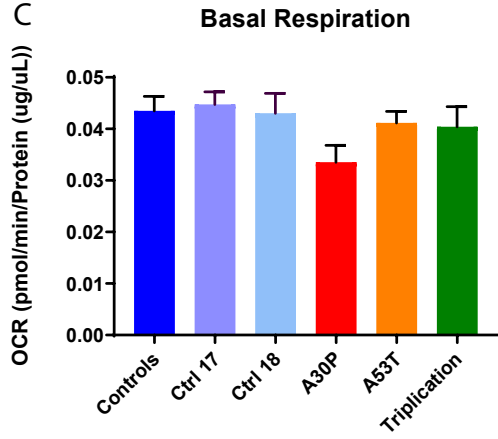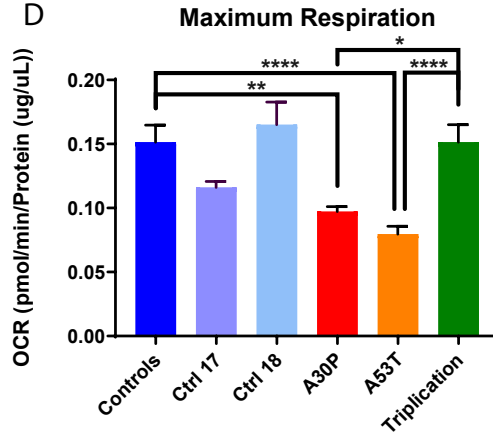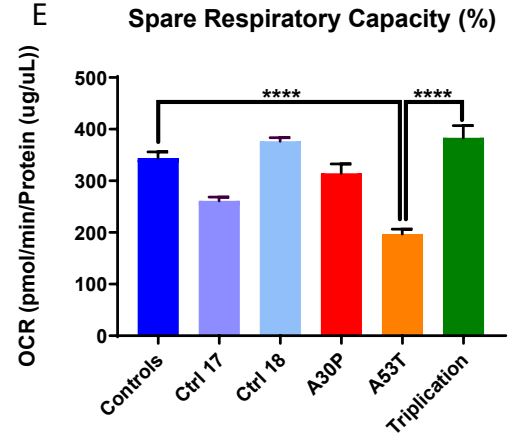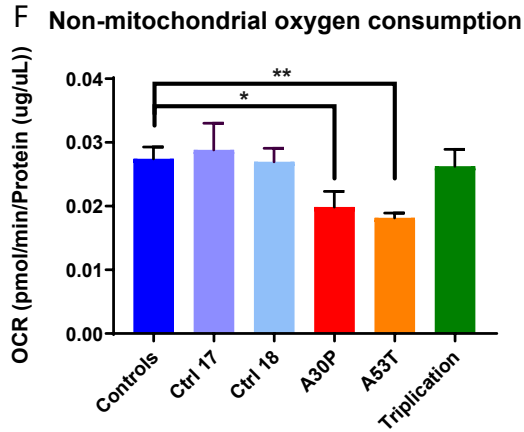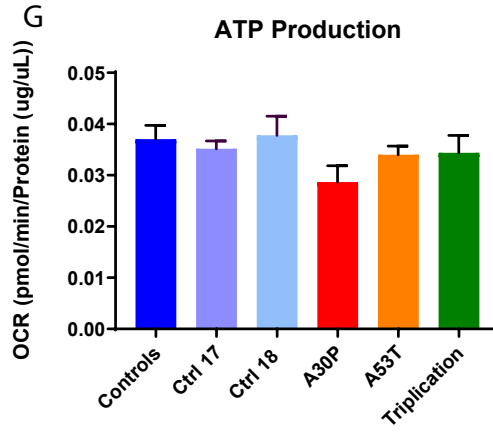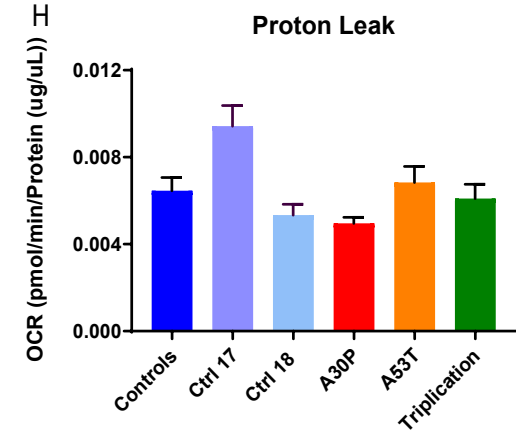

Source: https://www.biorxiv.org/content/biorxiv/early/2020/04/28/2020.04.27.053470.full.pdf
